# Supplementary material for: Retrieval of surface solar irradiance from satellite imagery using machine learning: pitfalls and perspectives
Source: Copernicus journal article supplement (doi:10.5194/amt-16-4165-2023), 2023-09-19
Supplement: Supplementary file 1 [file amt-16-4165-2023-supplement.zip]

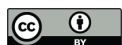

## *Supplement of*

# **Retrieval of surface solar irradiance from satellite imagery using machine learning: pitfalls and perspectives**

**Hadrien Verbois et al.**

*Correspondence to:* Hadrien Verbois ([hadrien.verbois@minesparis.psl.eu](mailto:hadrien.verbois@minesparis.psl.eu))

- [amt-16-4165-2023-supplement-title-page.pdf](#)
- [data\\_driven\\_model.ipynb](#)

The copyright of individual parts of the supplement might differ from the article licence.
